# Supplementary material
Source: HighWire-hosted journal article supplement (https://bmjophth.bmj.com/content/4/1/e000202)

## **RESULTS OF RAPID ASSESSMENT OF AVOIDABLE BLINDNESS**

### **REASONS WHY PEOPLE, BLIND DUE TO CATARACT, HAVE NOT BEEN OPERATED**

Date and time of report: 05-10-2017 08:57:52

This report is for the survey area: Dattawadi

Year and month when survey was conducted: 2017- 6 until 2017- 8

RAAB is designed as a rapid procedure and there is not enough time during the RAAB to hold in-dept interviews why people blind from cataract have not yet been operated. Hence, the data on barriers should be regarded as an indication whether more detailed qualitative studies are required.

#### **1. Barriers to cataract surgery in sample (bilateral BCVA<6/60 due to cataract)**

|                               | Males     |               | Females   |               | Total     |               |
|-------------------------------|-----------|---------------|-----------|---------------|-----------|---------------|
|                               | n         | %             | n         | %             | n         | %             |
| Need not felt                 | 6         | 31.6%         | 9         | 40.9%         | 15        | 36.6%         |
| Fear                          | 1         | 5.3%          | 3         | 13.6%         | 4         | 9.8%          |
| Cost                          | 9         | 47.4%         | 4         | 18.2%         | 13        | 31.7%         |
| Treatment denied by provider  | 1         | 5.3%          | 3         | 13.6%         | 4         | 9.8%          |
| Unaware treatment is possible | 0         | 0.0%          | 0         | 0.0%          | 0         | 0.0%          |
| Cannot access treatment       | 0         | 0.0%          | 0         | 0.0%          | 0         | 0.0%          |
| Local reason                  | 2         | 10.5%         | 3         | 13.6%         | 5         | 12.2%         |
| <b>Total</b>                  | <b>19</b> | <b>100.0%</b> | <b>22</b> | <b>100.0%</b> | <b>41</b> | <b>100.0%</b> |

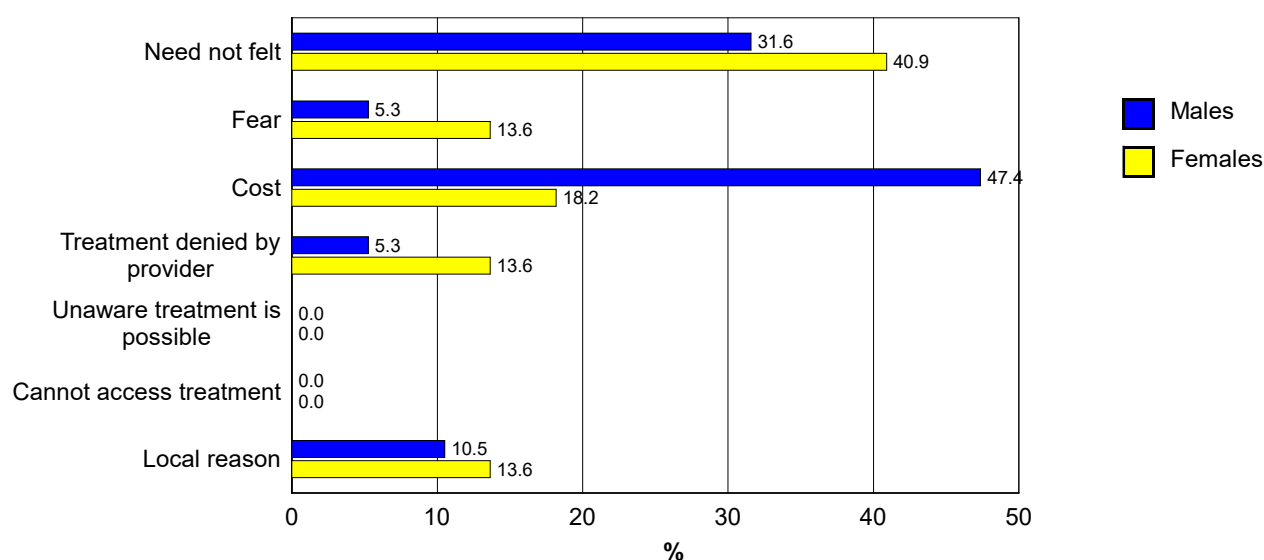

## 2. Barriers to cataract surgery in sample (unilateral BCVA<6/60 due to cataract)

|                               | Males     |               | Females   |               | Total      |               |
|-------------------------------|-----------|---------------|-----------|---------------|------------|---------------|
|                               | n         | %             | n         | %             | n          | %             |
| Need not felt                 | 38        | 52.8%         | 52        | 55.9%         | 90         | 54.5%         |
| Fear                          | 4         | 5.6%          | 5         | 5.4%          | 9          | 5.5%          |
| Cost                          | 19        | 26.4%         | 23        | 24.7%         | 42         | 25.5%         |
| Treatment denied by provider  | 0         | 0.0%          | 5         | 5.4%          | 5          | 3.0%          |
| Unaware treatment is possible | 0         | 0.0%          | 0         | 0.0%          | 0          | 0.0%          |
| Cannot access treatment       | 0         | 0.0%          | 0         | 0.0%          | 0          | 0.0%          |
| Local reason                  | 11        | 15.3%         | 8         | 8.6%          | 19         | 11.5%         |
| <b>Total</b>                  | <b>72</b> | <b>100.0%</b> | <b>93</b> | <b>100.0%</b> | <b>165</b> | <b>100.0%</b> |

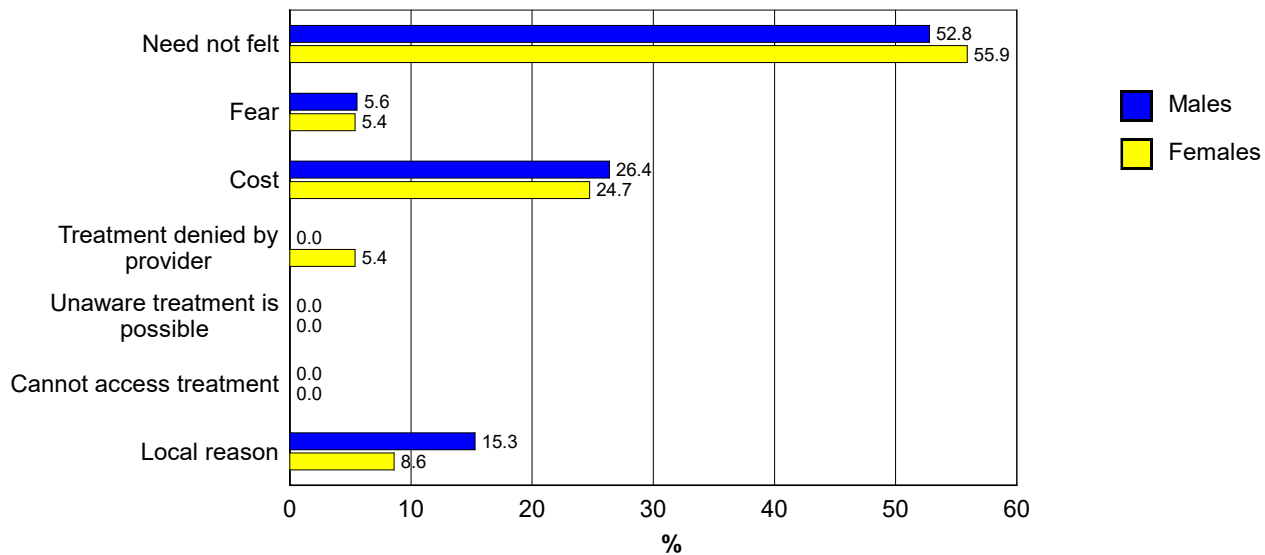

Supplement: inline-supplementary-material-3 [file inline-supplementary-material-3.pdf]
