# Supplementary material
Source: HighWire-hosted journal article supplement (https://bmjophth.bmj.com/content/4/1/e000202)
Supplement: inline-supplementary-material-4 [file inline-supplementary-material-4.pdf]

# **RESULTS OF RAPID ASSESSMENT OF AVOIDABLE BLINDNESS**

## **VISUAL OUTCOME AFTER CATARACT SURGERY (LONG-TERM OUTCOME)**

Date and time of report: 05-10-2017 08:58:13

This report is for the survey area: Dattawadi

Year and month when survey was conducted: 2017- 6 until 2017- 8

The visual acuity of all subjects operated earlier is measured with available correction and with a pinhole. This report gives population based data on visual outcome, not specific for one surgeon or one hospital and with follow-up periods ranging from one month to several decades. When cataract surgery took place several years earlier, the chance of vision loss due to other causes than cataract increases. If the proportion of eyes with a visual outcome less than 6/60 is higher than 10%, research into the possible causes of poor visual outcome is indicated.

### **1. VA in operated eyes in sample with available correction (PVA)**

|                          | Non-IOL   |               | IOL          |               | Couching |             | Total        |               |
|--------------------------|-----------|---------------|--------------|---------------|----------|-------------|--------------|---------------|
|                          | Eyes      | %             | Eyes         | %             | Eyes     | %           | Eyes         | %             |
| Very good: can see 6/12  | 1         | 5.6%          | 561          | 47.9%         | 0        | 0.0%        | <b>562</b>   | <b>47.2%</b>  |
| Good: can see 6/18       | 0         | 0.0%          | 243          | 20.7%         | 0        | 0.0%        | <b>243</b>   | <b>20.4%</b>  |
| Borderline: can see 6/60 | 8         | 44.4%         | 262          | 22.4%         | 0        | 0.0%        | <b>270</b>   | <b>22.7%</b>  |
| Poor: cannot see 6/60    | 9         | 50.0%         | 106          | 9.0%          | 0        | 0.0%        | <b>115</b>   | <b>9.7%</b>   |
| <b>Total</b>             | <b>18</b> | <b>100.0%</b> | <b>1,172</b> | <b>100.0%</b> | <b>0</b> | <b>0.0%</b> | <b>1,190</b> | <b>100.0%</b> |

### **2. VA in operated eyes in sample with best correction (BCVA)**

|                          | Non-IOL   |               | IOL          |               | Couching |             | Total        |               |
|--------------------------|-----------|---------------|--------------|---------------|----------|-------------|--------------|---------------|
|                          | Eyes      | %             | Eyes         | %             | Eyes     | %           | Eyes         | %             |
| Very good: can see 6/12  | 1         | 5.6%          | 693          | 59.1%         | 0        | 0.0%        | <b>694</b>   | <b>58.3%</b>  |
| Good: can see 6/18       | 1         | 5.6%          | 202          | 17.2%         | 0        | 0.0%        | <b>203</b>   | <b>17.1%</b>  |
| Borderline: can see 6/60 | 7         | 38.9%         | 189          | 16.1%         | 0        | 0.0%        | <b>196</b>   | <b>16.5%</b>  |
| Poor: cannot see 6/60    | 9         | 50.0%         | 88           | 7.5%          | 0        | 0.0%        | <b>97</b>    | <b>8.2%</b>   |
| <b>Total</b>             | <b>18</b> | <b>100.0%</b> | <b>1,172</b> | <b>100.0%</b> | <b>0</b> | <b>0.0%</b> | <b>1,190</b> | <b>100.0%</b> |

### **3. VA in operated eyes in sample by years after surgery**

|                          | 3 yrs postop |               | 4 - 6 yrs postop. |               | 7+ yrs postop |               | Total        |               |
|--------------------------|--------------|---------------|-------------------|---------------|---------------|---------------|--------------|---------------|
|                          | Eyes         | %             | Eyes              | %             | Eyes          | %             | Eyes         | %             |
| Very good: can see 6/12  | 259          | 57.0%         | 146               | 46.3%         | 157           | 37.3%         | <b>562</b>   | <b>47.2%</b>  |
| Good: can see 6/18       | 81           | 17.8%         | 72                | 22.9%         | 90            | 21.4%         | <b>243</b>   | <b>20.4%</b>  |
| Borderline: can see 6/60 | 86           | 18.9%         | 74                | 23.5%         | 110           | 26.1%         | <b>270</b>   | <b>22.7%</b>  |
| Poor: cannot see 6/60    | 28           | 6.2%          | 23                | 7.3%          | 64            | 15.2%         | <b>115</b>   | <b>9.7%</b>   |
| <b>Total</b>             | <b>454</b>   | <b>100.0%</b> | <b>315</b>        | <b>100.0%</b> | <b>421</b>    | <b>100.0%</b> | <b>1,190</b> | <b>100.0%</b> |

### **4. Age at time of surgery in males and females**

|              | Males      |               | Females    |               | Total        |               |
|--------------|------------|---------------|------------|---------------|--------------|---------------|
|              | Eyes       | %             | Eyes       | %             | Eyes         | %             |
| 1 - 29       | 0          | 0.0%          | 0          | 0.0%          | <b>0</b>     | <b>0.0%</b>   |
| 30 - 39      | 1          | 0.2%          | 3          | 0.4%          | <b>4</b>     | <b>0.3%</b>   |
| 40 - 49      | 22         | 4.7%          | 42         | 5.8%          | <b>64</b>    | <b>5.4%</b>   |
| 50 - 59      | 91         | 19.6%         | 209        | 28.8%         | <b>300</b>   | <b>25.2%</b>  |
| 60 - 69      | 198        | 42.6%         | 299        | 41.2%         | <b>497</b>   | <b>41.8%</b>  |
| 70 - 79      | 141        | 30.3%         | 153        | 21.1%         | <b>294</b>   | <b>24.7%</b>  |
| 80+          | 12         | 2.6%          | 19         | 2.6%          | <b>31</b>    | <b>2.6%</b>   |
| <b>Total</b> | <b>465</b> | <b>100.0%</b> | <b>725</b> | <b>100.0%</b> | <b>1,190</b> | <b>100.0%</b> |

## 5. Place of surgery by sex

|                               | Males      |              | Females    |              | Total        |              |
|-------------------------------|------------|--------------|------------|--------------|--------------|--------------|
|                               | Eyes       | %            | Eyes       | %            | Eyes         | %            |
| Government Hosp.              | 109        | 23.4         | 144        | 19.9         | <b>253</b>   | <b>21.3</b>  |
| Voluntary/charitable hospital | 123        | 26.5         | 227        | 31.3         | <b>350</b>   | <b>29.4</b>  |
| Private hospital              | 223        | 48.0         | 325        | 44.8         | <b>548</b>   | <b>46.1</b>  |
| Eyecamp                       | 10         | 2.2          | 29         | 4.0          | <b>39</b>    | <b>3.3</b>   |
| <b>Total</b>                  | <b>465</b> | <b>100.0</b> | <b>725</b> | <b>100.0</b> | <b>1,190</b> | <b>100.0</b> |

## 6. Post-op VA with available correction by place of surgery

|                          | Gov. Hosp. |              | Vol. Hosp. |              | Priv. Hosp. |              | Eye camp  |              | Total        |              |
|--------------------------|------------|--------------|------------|--------------|-------------|--------------|-----------|--------------|--------------|--------------|
|                          | Eyes       | %            | Eyes       | %            | Eyes        | %            | Eyes      | %            | Eyes         | %            |
| Very good: can see 6/12  | 100        | 39.5         | 150        | 42.9         | 297         | 54.2         | 15        | 38.5         | <b>562</b>   | <b>47.2</b>  |
| Good: can see 6/18       | 54         | 21.3         | 77         | 22.0         | 106         | 19.3         | 6         | 15.4         | <b>243</b>   | <b>20.4</b>  |
| Borderline: can see 6/60 | 65         | 25.7         | 89         | 25.4         | 104         | 19.0         | 12        | 30.8         | <b>270</b>   | <b>22.7</b>  |
| Poor: cannot see 6/60    | 34         | 13.4         | 34         | 9.7          | 41          | 7.5          | 6         | 15.4         | <b>115</b>   | <b>9.7</b>   |
| <b>Total</b>             | <b>253</b> | <b>100.0</b> | <b>350</b> | <b>100.0</b> | <b>548</b>  | <b>100.0</b> | <b>39</b> | <b>100.0</b> | <b>1,190</b> | <b>100.0</b> |

## 7. Post-op presenting VA and causes of borderline and poor outcome

|                          | Selection  |              | Surgery    |              | Spectacles |              | Sequelae   |              | Can see 6/12 |              | Total        |              |
|--------------------------|------------|--------------|------------|--------------|------------|--------------|------------|--------------|--------------|--------------|--------------|--------------|
|                          | Eyes       | %            | Eyes       | %            | Eyes       | %            | Eyes       | %            | Eyes         | %            | Eyes         | %            |
| Very good: can see 6/12  | 0          | 0.0          | 0          | 0.0          | 0          | 0.0          | 0          | 0.0          | 562          | 100.0        | <b>562</b>   | <b>47.2</b>  |
| Good: can see 6/18       | 57         | 21.7         | 36         | 35.0         | 102        | 73.4         | 48         | 39.0         | 0            | 0.0          | <b>243</b>   | <b>20.4</b>  |
| Borderline: can see 6/60 | 124        | 47.1         | 44         | 42.7         | 34         | 24.5         | 68         | 55.3         | 0            | 0.0          | <b>270</b>   | <b>22.7</b>  |
| Poor: cannot see 6/60    | 82         | 31.2         | 23         | 22.3         | 3          | 2.2          | 7          | 5.7          | 0            | 0.0          | <b>115</b>   | <b>9.7</b>   |
| <b>Total</b>             | <b>263</b> | <b>100.0</b> | <b>103</b> | <b>100.0</b> | <b>139</b> | <b>100.0</b> | <b>123</b> | <b>100.0</b> | <b>562</b>   | <b>100.0</b> | <b>1,190</b> | <b>100.0</b> |

## 8. Proportion and type of surgery

|              | Males      |              | Females    |              | Total        |              |
|--------------|------------|--------------|------------|--------------|--------------|--------------|
|              | Eyes       | %            | Eyes       | %            | Eyes         | %            |
| Non-IOL      | 5          | 1.1          | 13         | 1.8          | <b>18</b>    | <b>1.5</b>   |
| IOL          | 460        | 98.9         | 712        | 98.2         | <b>1,172</b> | <b>98.5</b>  |
| Couching     | 0          | 0.0          | 0          | 0.0          | <b>0</b>     | <b>0.0</b>   |
| <b>Total</b> | <b>465</b> | <b>100.0</b> | <b>725</b> | <b>100.0</b> | <b>1,190</b> | <b>100.0</b> |
